# Supplementary material for: White blood cell margination in microcirculation
Source: Royal Society of Chemistry journal article supplement (doi:10.1039/c3sm52860j), 2014-01-01
Supplement: c3sm52860j.pdf [file c3sm52860j.pdf]

## Supplementary information

### White blood cell margination in microcirculation

Dmitry A. Fedosov and Gerhard Gompper

#### Description of supplemental movies

The movies illustrate the dynamics of red blood cells (RBCs) and a white blood cell (WBC) in 3D blood flow simulations. RBCs are shown in red, while a WBC is drawn in white. The flow is from the left to the right.

**Movie S1 (movie\_ht0.3\_g30.mpg):** The movie shows the 3D blood flow for  $H_t = 0.3$  and  $\dot{\gamma}^* = 32$ , where the WBC is margined toward the wall.

**Movie S2 (movie\_ht0.2\_g115.mpg):** The movie shows the 3D blood flow for  $H_t = 0.2$  and  $\dot{\gamma}^* = 115$ , where no WBC margination occurs.
